# Supplementary material for: A nonflammable low-concentration electrolyte for lithium-ion batteries
Source: Royal Society of Chemistry journal article supplement (doi:10.1039/d2ta01760a), 2022-01-01
Supplement: d2ta01760a2.pdf [file d2ta01760a2.pdf]

## Electronic Supplementary Material (ESI)

### S1. Methods

Molecular dynamics (MD) simulation: We used the relaxed system as a starting configuration. As it is before system relaxation MD, energy minimization was carried out with a composite protocol of steepest descent using termination gradients of  $100 \text{ kJ} (\text{mol} \cdot \text{nm})$ . A 10 ns NPT relaxation run at 298K for the equilibrium MD simulation. The Nose'-Hoover thermostat was used to maintain the equilibrium temperature at 298 K, and periodic boundary conditions were imposed on all three dimensions [1]. The Particle Mesh-Ewald method was used to compute long-range electrostatics within a relative tolerance of  $1 \times 10^{-6}$  [2,3]. A cut-off distance of 1nm was applied to real-space Ewald interactions. The same value was used for van der Waals interactions. The LINCS algorithm was applied to constrain bond lengths of hydrogen atoms [4]. A leap-frog algorithm was used with a time step of 1 fs [5].

### S2. Figures and Tables

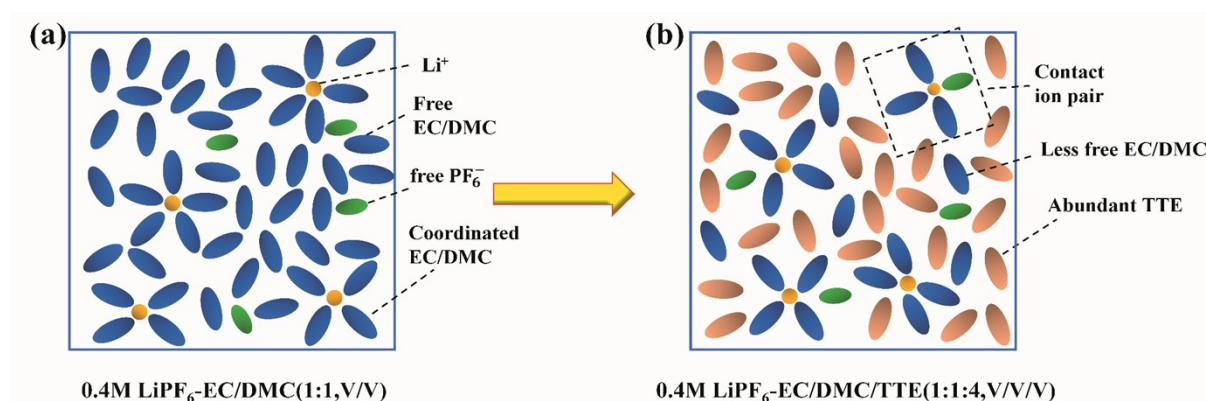

Fig. S1 The schemes of the  $\text{Li}^+$ -solvation structures in the 0.4M  $\text{LiPF}_6$ -EC/DMC (1:1, v/v) and 0.4M  $\text{LiPF}_6$ -EC/DMC/TTE (1:1:4, v/v/v)

Table S1 The compositions of electrolytes for all-atom MD simulation.

|          | $PF_6^-$ | $Li^+$ | EC  | DMC | TTE | Box size (nm)  |
|----------|----------|--------|-----|-----|-----|----------------|
| 0.4M-11  | 48       | 48     | 900 | 704 | 0   | 6.14*6.14*6.14 |
| 0.4M-111 | 48       | 48     | 600 | 469 | 265 | 6.04*6.04*6.04 |
| 0.4M-112 | 48       | 48     | 450 | 352 | 398 | 6.00*6.00*6.00 |
| 0.4M-113 | 48       | 48     | 360 | 281 | 477 | 5.98*5.98*5.98 |
| 0.4M-114 | 48       | 48     | 300 | 234 | 530 | 5.96*5.96*5.96 |

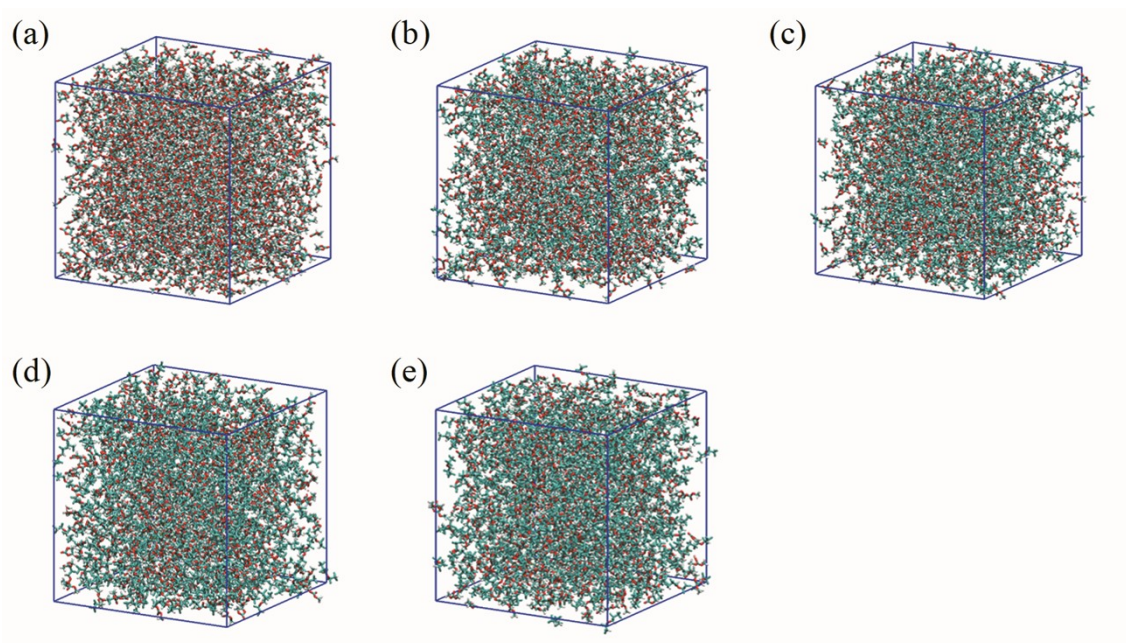

Fig. S2 All-atom MD simulation snapshots of (a)0.4M-11, (b)0.4M-111, (c)0.4M-112, (d)0.4M-113, (e)0.4M-114. Color code: H, White; O, Red; C, Pale blue; Li, Dull yellow; P, Green; F, Dark blue.

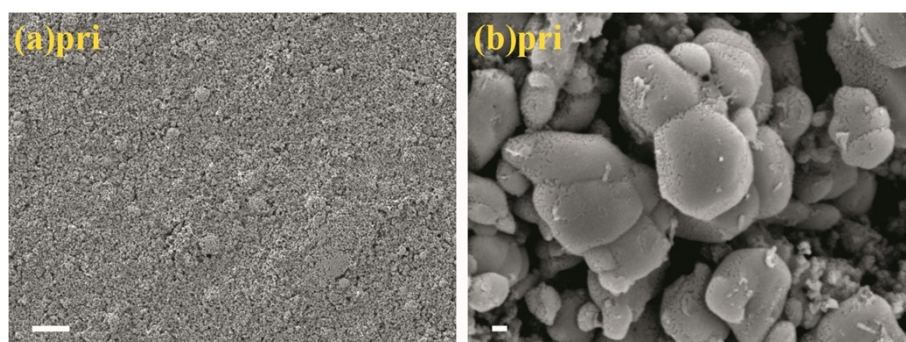

Fig. S3 Top view of LFP cathode before cycling (a) and morphology of LFP particles before cycling (b). Scale bars, 10 $\mu$ m (a) and 100nm (b).

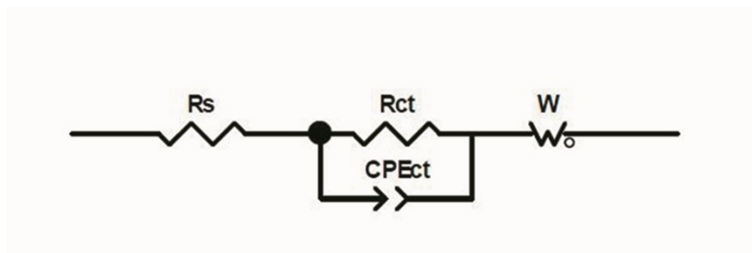

Fig. S4 Equivalent circuit used for fitting the EIS of Li||LFP cells.

Table S2 EIS fitting results for Li||LFP cells with different electrolytes.

| Li  LFP cells | After 3 cycles |                  | After 302 cycles |                  |
|---------------|----------------|------------------|------------------|------------------|
|               | $R_s(\Omega)$  | $R_{ct}(\Omega)$ | $R_s(\Omega)$    | $R_{ct}(\Omega)$ |
| 0.4M-11       | 3.33           | 175.1            | 52.07            | 379.6            |
| 0.4M-111      | 3.57           | 75.62            | 6.77             | 235.5            |
| 0.4M-112      | 3.8            | 71.4             | 6.23             | 178              |
| 0.4M-113      | 4.1            | 38.54            | 6.57             | 47.5             |
| 0.4M-114      | 5.43           | 26               | 7.80             | 31.13            |
| 1M-11         | 3.58           | 112.1            | 8.66             | 239.6            |

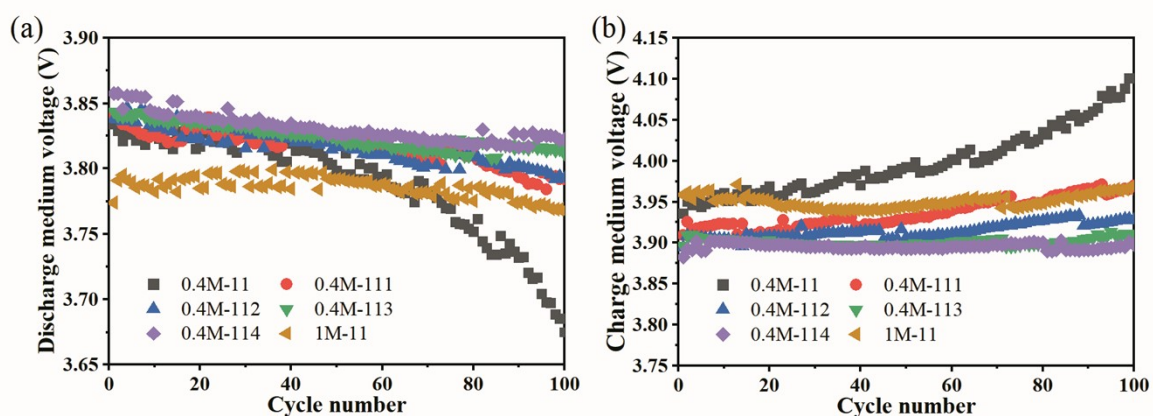

Fig. S5 The discharge medium voltages (a) and charge medium voltages (b) of the Li||NCM811 cells with different electrolytes at 1C.

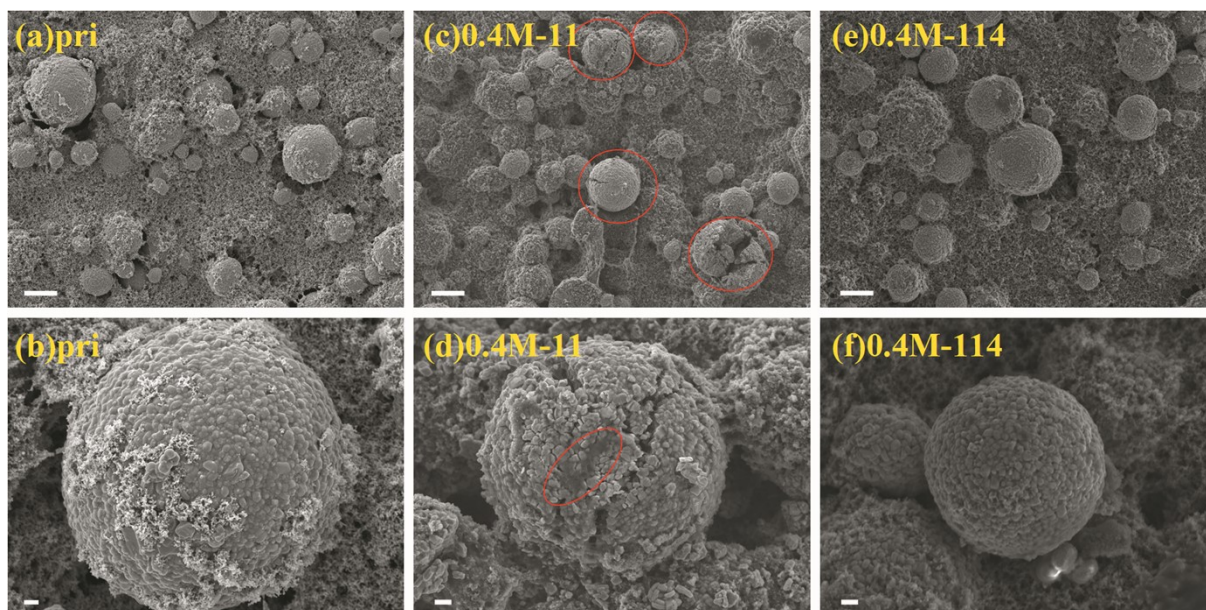

Fig. S6 Morphologies of NCM811 cathodes before cycling (a, b) and after 100 cycles in the 0.4M-11(c, d) and 0.4M-114 electrolyte (e, f). Scale bars, 10 $\mu$ m (a, c, e) and 1 $\mu$ m (b, d, f).

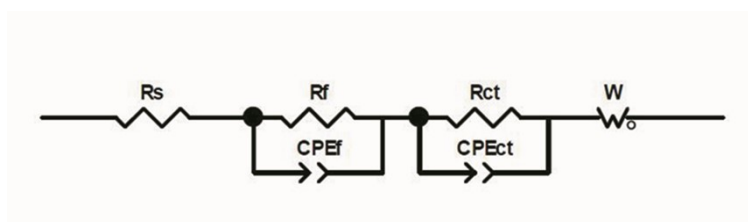

Fig. S7 The equivalent circuit used for fitting the EIS of Li||NCM811 cells.

Table S3 EIS fitting results for Li||NCM811 cells with different electrolytes.

| Li  NCM811 cells | After 4 cycles |               |                  | After 103 cycles |               |                  |
|------------------|----------------|---------------|------------------|------------------|---------------|------------------|
|                  | $R_s(\Omega)$  | $R_f(\Omega)$ | $R_{ct}(\Omega)$ | $R_s(\Omega)$    | $R_f(\Omega)$ | $R_{ct}(\Omega)$ |
| 0.4M-11          | 3.74           | 15.56         | 135.7            | 18.24            | 48.07         | 277.8            |
| 0.4M-111         | 4.30           | 16.16         | 109.1            | 9.86             | 29.86         | 213              |
| 0.4M-112         | 4.92           | 21.76         | 103              | 8.70             | 26.51         | 163.1            |
| 0.4M-113         | 6.13           | 21.03         | 64.71            | 7.37             | 21.23         | 112.6            |
| 0.4M-114         | 6.62           | 22.88         | 53.97            | 6.38             | 16.2          | 92.46            |
| 1M-11            | 4.16           | 22.84         | 79.18            | 9.91             | 24.2          | 171.5            |

## References

- [1] J. Berendsen, H. J.; Postma, J. P. M.; van Gunsteren, W. F.; DiNola, A.; Haak, J. *Chem. Phys.* **1984**, *81*, 3684.
- [2] U. Essmann, L. Perera, M. L. Berkowitz, T. Darden, H. Lee, L. G. Pedersen, *J. Chem. Phys.* **1995**, *103*, 8577.
- [3] L. G. Astrakas, C. Gousias, M. Tzaphlidou, in *J. Appl. Phys.*, **2012**.
- [4] B. Hess, H. Bekker, H. J. C. Berendsen, J. G. E. M. Fraaije, *J. Comput. Chem.* **1997**, *18*, 1463.
- [5] W. F. Van Gunsteren, H. J. C. Berendsen, *Mol. Simul.* **1988**, *1*, 173.
